# Supplementary material for: Using blood hemoglobin for blood analysis
Source: Royal Society of Chemistry journal article supplement (doi:10.1039/b613335e), 2006-11-24
Supplement: b613335e.pdf [file b613335e.pdf]

# USING BLOOD HEMOGLOBIN FOR BLOOD ANALYSIS.

*Vanesa Sanz, Susana de Marcos and Javier Galbán\*.*

Analytical Biosensors Group, Analytical Chemistry Department, Faculty of Sciences, University of Zaragoza and Institute of Nanotechnology, Zaragoza-50009, SPAIN.

## **Index:**

|                                                           |       |
|-----------------------------------------------------------|-------|
| 1.- pH effect on the autoxidation kinetic .....           | ESI-2 |
| 2.- H <sub>2</sub> O <sub>2</sub> calibration lines ..... | ESI-3 |
| 3.- Study of the Hb/GOx electron transfer .....           | ESI-5 |

## 1.-pH effect on autoxidation kinetic

The **figure ESI-1** shows the effect of the pH on the HbII.O<sub>2</sub> autoxidation (◆) and HbII.O<sub>2</sub>/H<sub>2</sub>O<sub>2</sub> reaction (■). As can be seen for low pH values, the autoxidation dominates. For pH=4 or higher the HbII.O<sub>2</sub>/H<sub>2</sub>O<sub>2</sub> dominates; for pH=5 or higher the autoxidation is negligible.

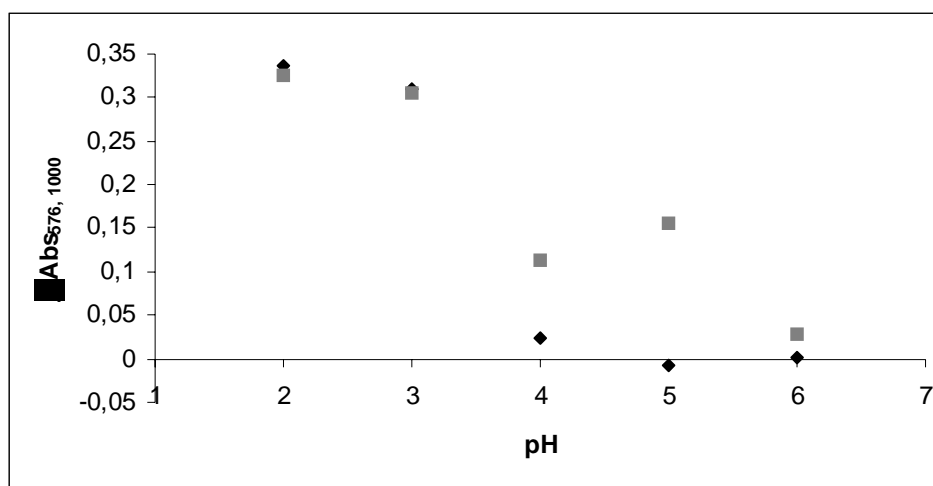

**Figure ESI-1.** Conditions: blood dilution 1/250 in citrate buffer at different pH and  $2.2 \cdot 10^{-5}$  M H<sub>2</sub>O<sub>2</sub> (no H<sub>2</sub>O<sub>2</sub> addition in the autoxidation assays)

## 2.-H<sub>2</sub>O<sub>2</sub> calibration lines

As has been indicated the equation (9) in the main text admits several simplifications depending on the measurement times considered. Table ESI-1 shows the most important simplifications for the purposes of this paper and figures ESI-2 and ESI-3 demonstrate how these simplified equations are fulfilled for the time interval given.

| t. interval | Simplification applied                                                                | Mathematical model                                                                                                                                                              | K <sup>Hb</sup> , M <sup>-1</sup> s <sup>-1</sup> |
|-------------|---------------------------------------------------------------------------------------|---------------------------------------------------------------------------------------------------------------------------------------------------------------------------------|---------------------------------------------------|
| Full record | None                                                                                  | $\Delta Abs_{576,t} = \frac{2\Delta\epsilon_{576} [Hb]_0 [H_2O_2]_0 (1 - e^{-([Hb]_0 - 2[H_2O_2]_0)k_{Hb}t})}{2[H_2O_2]_0 - [Hb]_0 e^{-([Hb]_0 - 2[H_2O_2]_0)k_{Hb}t}}$ (ESI-1) | 14 ± 1                                            |
| > 2000 s    | [Hb] <sub>0</sub> > 2[H <sub>2</sub> O <sub>2</sub> ] <sub>0</sub>                    | $\Delta Abs_{576} = 2\Delta\epsilon_{576} [H_2O_2]_0$ (ESI-2)                                                                                                                   |                                                   |
|             | [Hb] <sub>0</sub> < 2[H <sub>2</sub> O <sub>2</sub> ] <sub>0</sub>                    | $\Delta Abs_{576} = \Delta\epsilon_{576} [Hb]_0$ (ESI-3)                                                                                                                        |                                                   |
| < 500 s     | Taylor polynomial approach<br>(e <sup>-x</sup> ≈ 1-x) (11)                            | $\Delta Abs_{576,t} = \Delta\epsilon_{576} \frac{2[Hb]_0 k_{Hb} t}{1 + [Hb]_0 k_{Hb} t} [H_2O_2]_0$ (ESI-4)                                                                     | 15 ± 1                                            |
| < 150 s     | * Taylor polynomial approach<br>(11)<br>* 1 + [Hb] <sub>0</sub> k <sub>Hb</sub> t ≈ 1 | $\Delta Abs_{576,t} = 2\Delta\epsilon_{576} [Hb]_0 k_{Hb} [H_2O_2]_0 t$ (ESI-5)                                                                                                 | 14 ± 2                                            |

**Table ESI-1.-** Different forms of equation (9) depending of the time interval considered

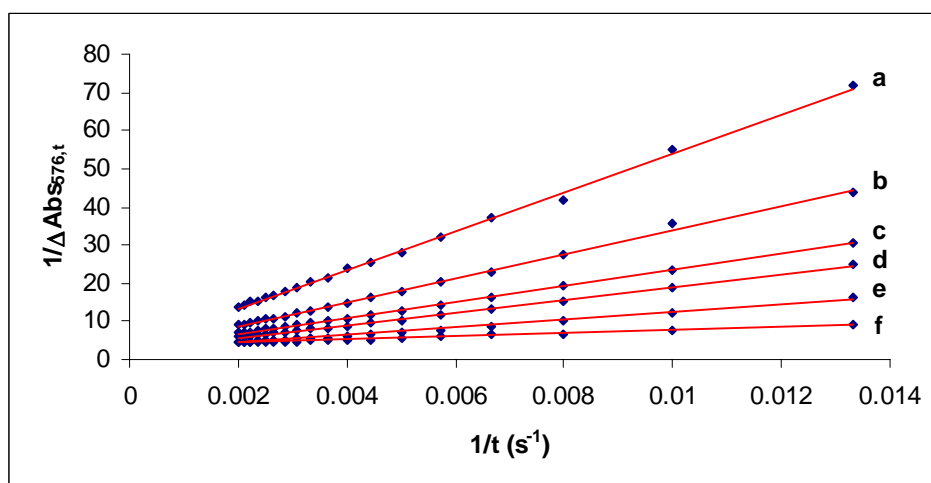

**Figure ESI-2.** Inverse of  $\Delta Abs_{576,t}$  change as a function of the inverse of time fitting according to equation (ESI-4) where there is a linear relationship.

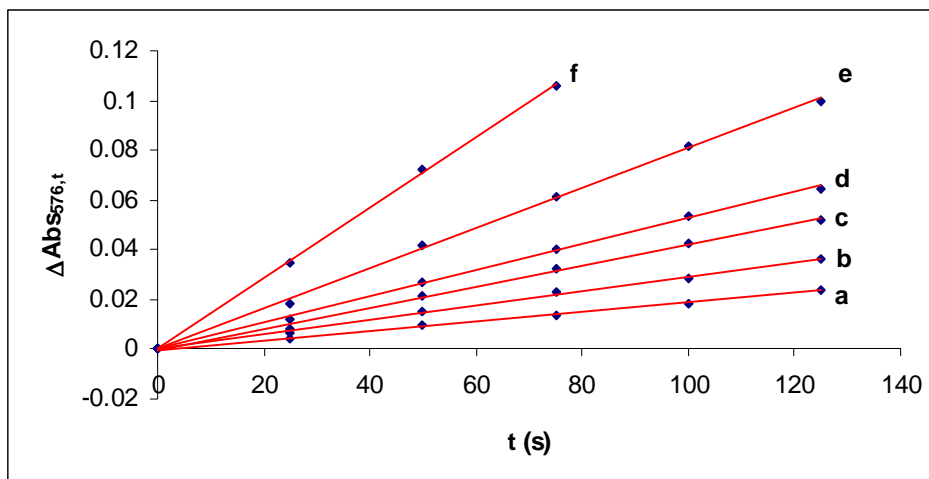

**Figure ESI-3.**  $\Delta\text{Abs}_{576,t}$  change as a function of the inverse of time fitting according to equation (ESI-5).

### 3.- Study of the Hb/GOx electron transfer

#### 1) The conclusion given in (Page 6, Main text)

a) *The only Hb species reacting with GOx is HbIII (the same oxidation state as in HRP) yielding HbIV<sup>+</sup> by intramolecular reduction,*

can be supported by results given in figure ESI-4. This figure shows the  $\Delta\text{Abs}_{576}$  variation versus time for different GOx concentrations. As can be seen, when the GOx concentration increases the absorbance variation decreases owing to the fact that the HbIV concentration increases as a result of the reaction between HbIII and GOx (see figure 2 of the Main test: the difference between molar absorptivities is lower for HbIIO<sub>2</sub>/HbIV than for HbIIO<sub>2</sub>/HbIII so that the absorbance variation is lower in the first case).

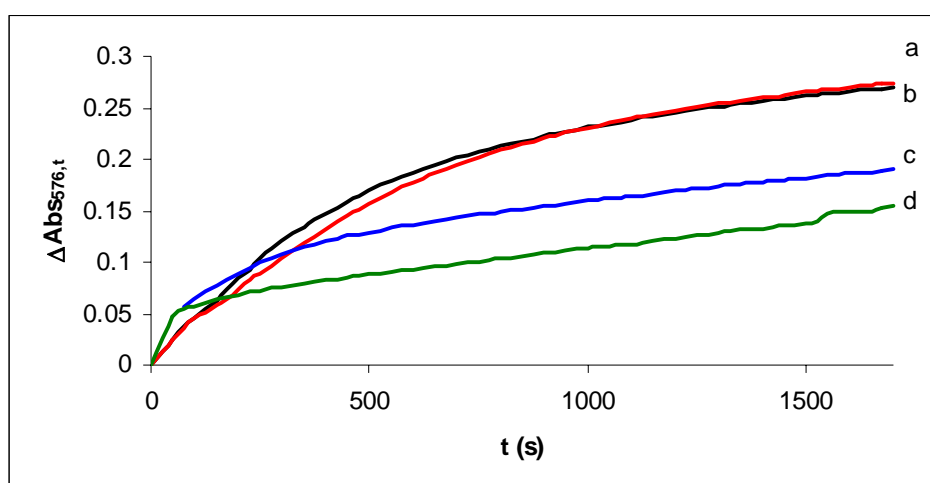

**Figure ESI-4.**  $\Delta\text{Abs}_{576,t}$  change as a function of time for different GOx concentrations in absence of azide. Experimental conditions:  $4.3 \cdot 10^{-5}$  M Hb,  $5.6 \cdot 10^{-5}$  M glucose concentrations and different GOX concentrations: **a)**  $6.2 \cdot 10^{-7}$  M (red); **b)**  $1.2 \cdot 10^{-6}$  M (black); **c)**  $1.0 \cdot 10^{-5}$  M (blue); **d)**  $5.0 \cdot 10^{-5}$  M (green).

**2) The conclusion given in (Page 6, Main text)****b) Azide partially inhibits the electron transfer between HbIII and GOx**is supported by data in figure **ESI-5**.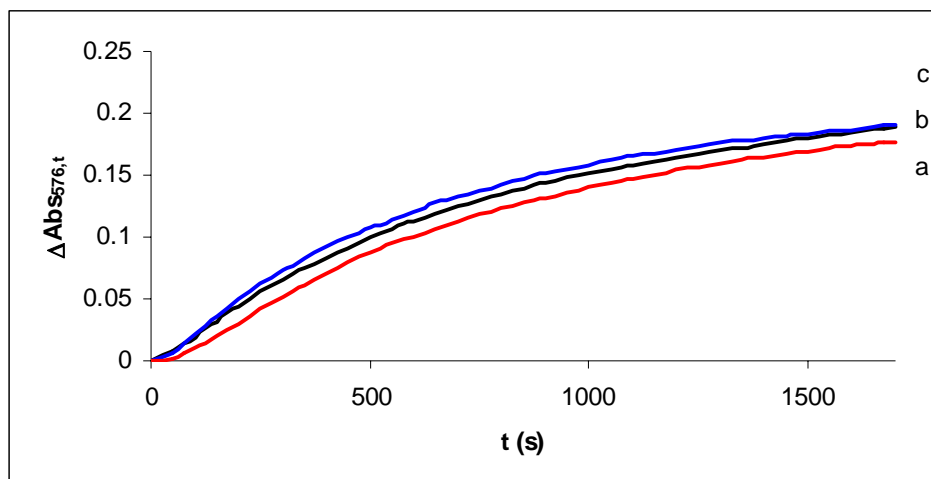

**Figure ESI-5.**  $\Delta\text{Abs}_{576,t}$  change as a function of time for different GOx concentrations in presence of azide. Experimental conditions:  $4.3 \cdot 10^{-5}$  M Hemoglobin ,  $5.6 \cdot 10^{-5}$  M glucose concentrations and different GOx concentrations: **a)**  $9.1 \cdot 10^{-7}$  M (red); **b)**  $5.1 \cdot 10^{-6}$  M (black); **c)**  $1.0 \cdot 10^{-5}$  M (blue).
